# Supplementary material for: In Silico Prediction of the Metabolic Resistance of Vitamin D Analogs against CYP3A4 Metabolizing Enzyme
Source: MDPI journal article supplement (doi:10.3390/ijms23147845), 2022-07-16
Supplement: s1 [file s1]

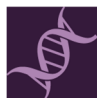

## Supplementary Materials

# *In silico* Prediction of the Metabolic Resistance of Vitamin D Analogs against CYP3A4 Metabolizing Enzyme

Teresa Żolek <sup>1,\*</sup>, Kaori Yasuda <sup>2</sup>, Geoffrey Brown <sup>3</sup>, Toshiyuki Sakaki <sup>2</sup> and Andrzej Kutner <sup>4</sup>

<sup>1</sup> Department of Organic Chemistry, Faculty of Pharmacy, Medical University of Warsaw, 1 Banacha, 02-097 Warsaw, Poland; tzolek@wum.edu.pl

<sup>2</sup> Department of Pharmaceutical Engineering, Toyama Prefectural University, Toyama 939-0398, Japan; kyasuda@pu-toyama.ac.jp (K.Y); tsakaki@pu-toyama.ac.jp (T.S)

<sup>3</sup> School of Biomedical Sciences, Institute of Clinical Sciences, College of Medical and Dental Sciences, University of Birmingham, Edgbaston, Birmingham B15 2TT, UK; g.brown@bham.ac.uk

<sup>4</sup> Department of Bioanalysis and Drug Analysis, Faculty of Pharmacy, Medical University of Warsaw, 1 Banacha, 02-097 Warsaw, Poland; andrzej.kutner@wum.edu.pl

\* Correspondence: tzolek@wum.edu.pl; Tel.: +48-225720643

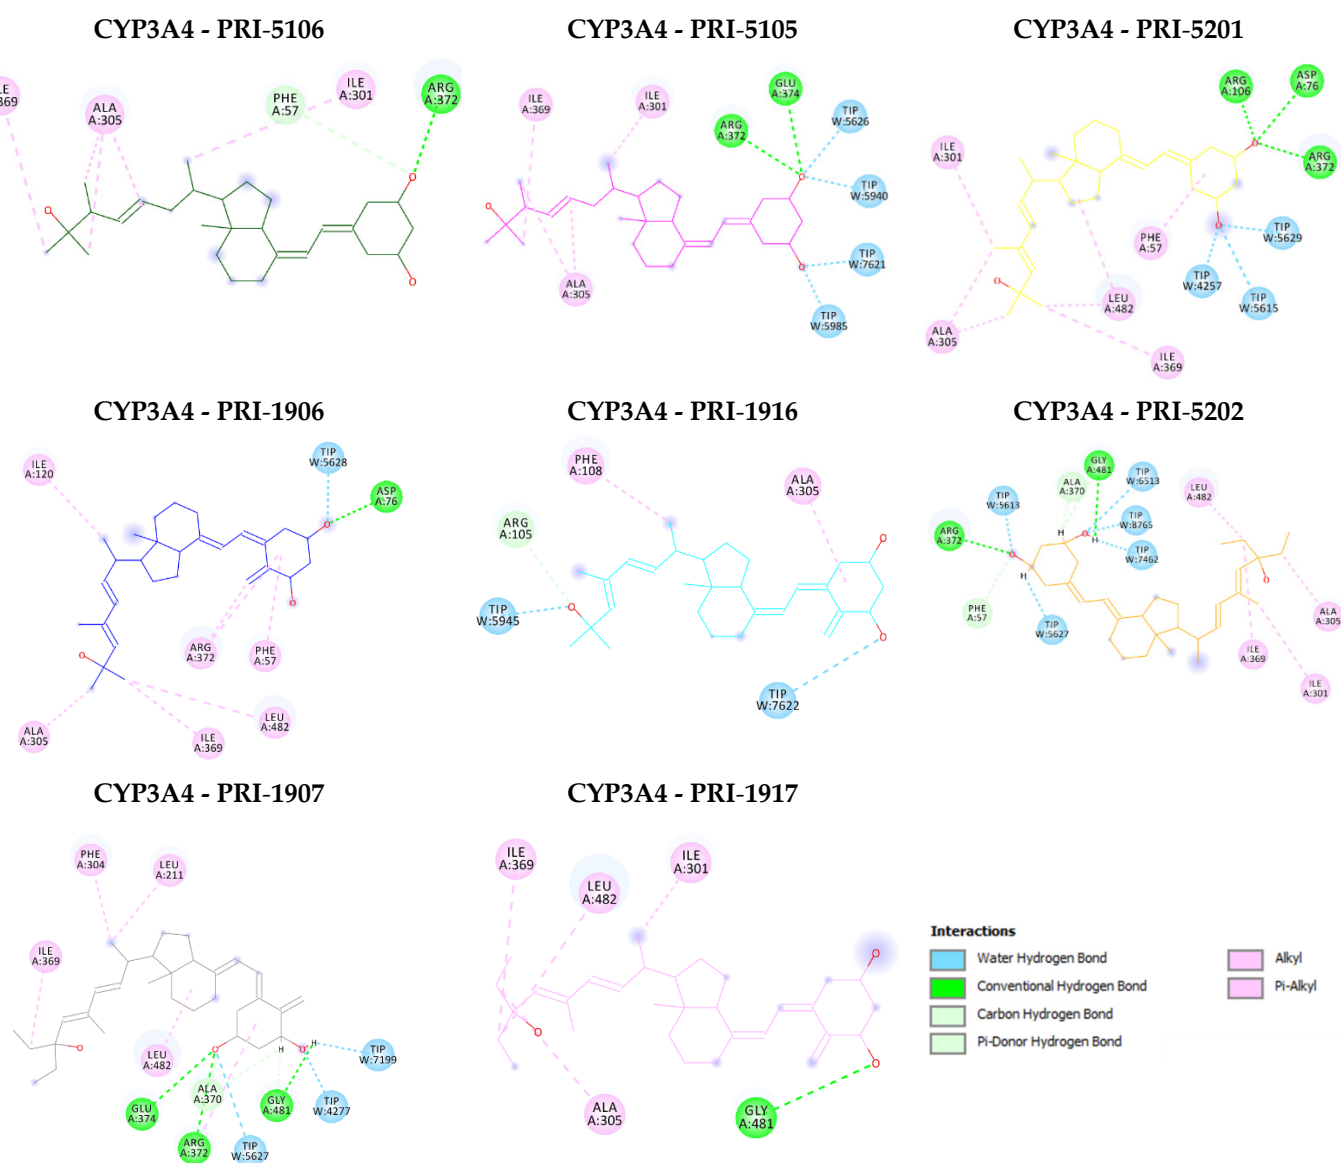

**Figure S1.** The 2D representation of the 1,25D2 analogs in the active site of CYP3A4.

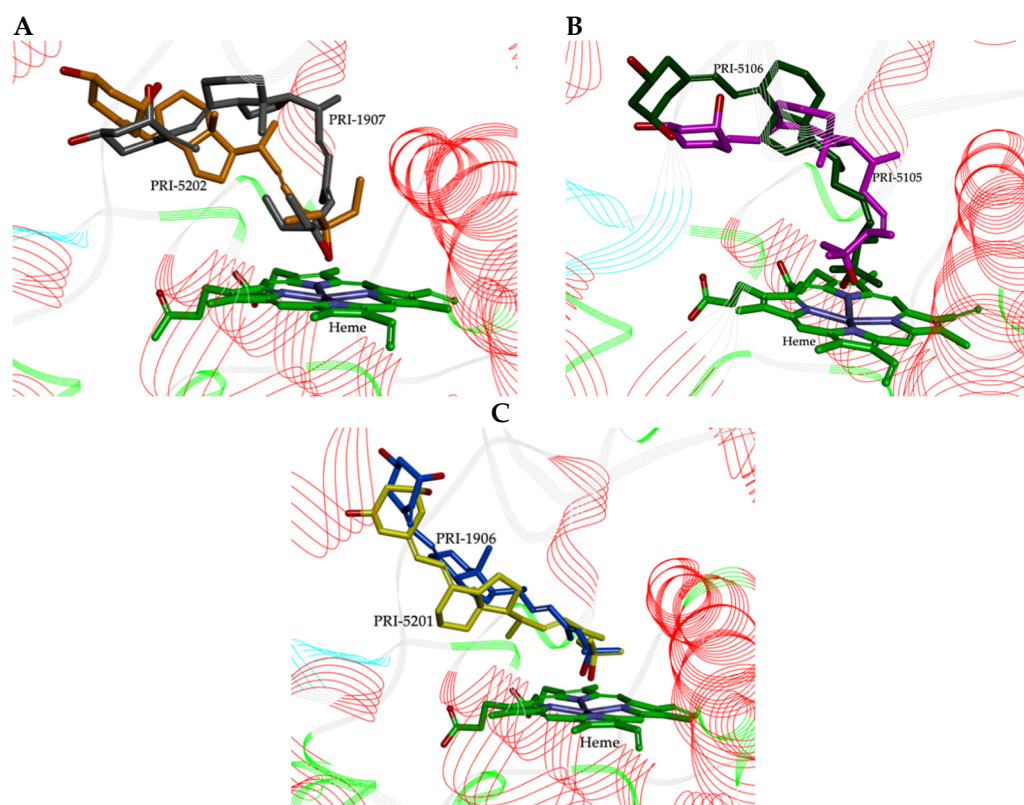

**Figure S2.** Illustration of conformational differences between 1,25D2 analogs which are located above the heme ring. (A) PRI-1907 (C atoms shown as grey) and PRI-5202 (C atoms shown as orange); (B) PRI-5105 (C atoms shown as magenta) and PRI-5106 (C atoms shown as dark green); (C) PRI-1906 (C atoms shown as blue) and PRI-5201 (C atoms shown as yellow).

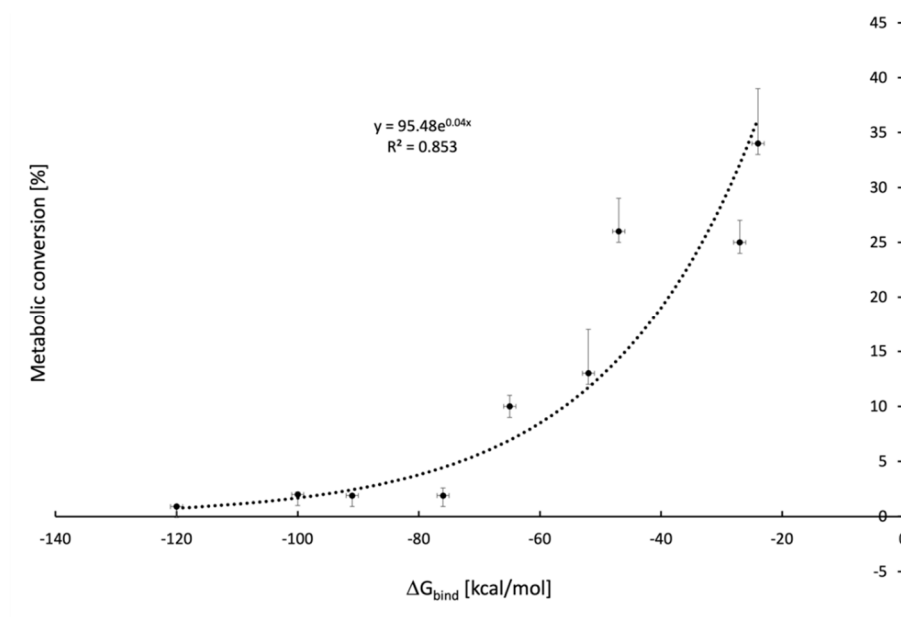

**Figure S3.** Correlation between the experimental metabolic conversion of 1,25D2 analogs by CYP24A1 and the free enthalpy of binding to CYP3A4. The exponential regression equation and its correlation coefficient are shown.

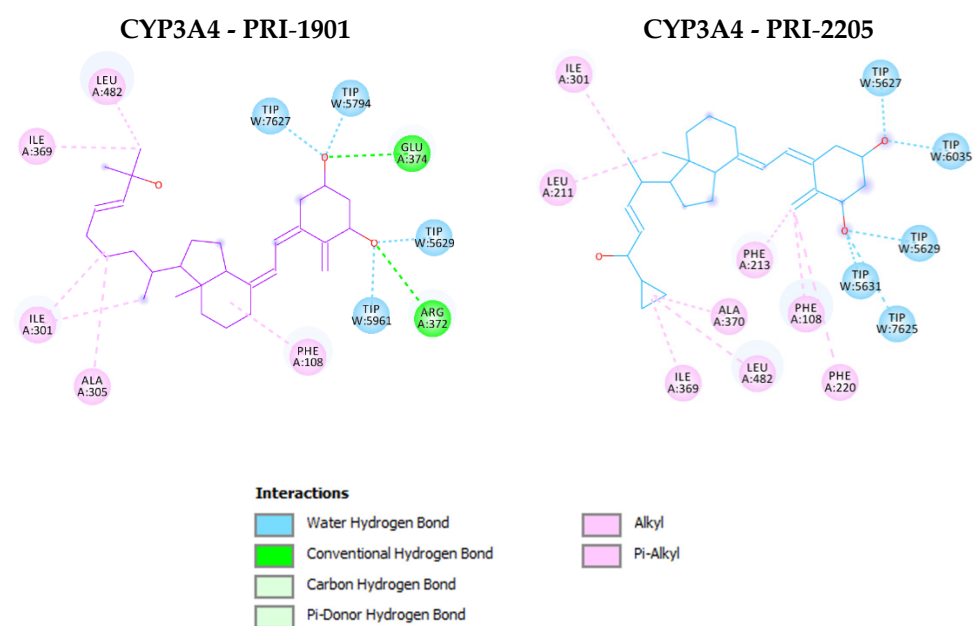

**Figure S4.** The 2D representation of the 1,25D3 analogs in the active site of CYP3A4.
